# Supplementary material for: Sensitivity and specificity of the Bamberg Dementia Screening Test’s (BDST) full and short versions: brief screening instruments for geriatric patients that are suitable for infectious environments
Source: Springer Nature journal article supplement (doi:10.1186/s12916-021-01927-4), 2021-03-05
Supplement: MOESM1 [file 18935182]

# BDST

| <b>First, I'm going to ask a few questions about animals.</b>                                                                                                                                                                                                                                                                                                                                   | <b>Points</b> |                                                                              | <b>6. What animals did I ask you about before we talked about the lion and the rabbit? (only rate the first 6 answers)</b> |
|-------------------------------------------------------------------------------------------------------------------------------------------------------------------------------------------------------------------------------------------------------------------------------------------------------------------------------------------------------------------------------------------------|---------------|------------------------------------------------------------------------------|----------------------------------------------------------------------------------------------------------------------------|
|                                                                                                                                                                                                                                                                                                                                                                                                 | <b>Pr.</b>    | <b>recall</b>                                                                |                                                                                                                            |
| 1. What is the name of the animal with the long trunk?<br>It's a very big animal and it can „trumpet“ using its trunk.                                                                                                                                                                                                                                                                          |               |                                                                              | Did I ask about a hippo, an elephant or a rhino?                                                                           |
| 2. What is the name of the animal with the very long neck?<br>This animal lives in Africa and has a yellow-brownish pattern.                                                                                                                                                                                                                                                                    |               |                                                                              | Did I ask about a leopard, a giraffe or a parrot?                                                                          |
| 3. What is the name of the animal which gives its name to a crosswalk with white and black stripes?<br>It is an animal that looks like a striped horse.                                                                                                                                                                                                                                         |               |                                                                              | Did I ask about a zebra, a tiger or a monkey?                                                                              |
| 4. What is the name of the bear that lives in very cold regions with ice?<br>Simply put together the words "bear" and "polar" in the correct order.                                                                                                                                                                                                                                             |               |                                                                              | Did I ask about a penguin, a seal or a polar bear?                                                                         |
| 5. Which animal are people more afraid of: a lion or a rabbit?<br>Why? (dangerous, carnivore etc.)                                                                                                                                                                                                                                                                                              |               |                                                                              |                                                                                                                            |
| <b>Please watch carefully [administrator draws a symbol with her/his index finger] and then try to draw the following shapes in the air (award 2 points if the first attempt and 1 point if the second attempt is correct)</b>                                                                                                                                                                  |               |                                                                              | <b>12. What figures did we draw in the air before we talked about big cities?</b>                                          |
| 7.<br>                                                                                                                                                                                                                                                                                                       |               |                                                                              | One shape was round.                                                                                                       |
| 8.<br>                                                                                                                                                                                                                                                                                                       |               |                                                                              | One shape looked like a peak.                                                                                              |
| 9.<br>                                                                                                                                                                                                                                                                                                       |               |                                                                              | One shape looked like a letter.                                                                                            |
| 10.<br>                                                                                                                                                                                                                                                                                                      |               |                                                                              | One shape looked like a number.                                                                                            |
| <b>11. Please name as many big cities in [add name of your country] or in the world as you can think of! You have 1 minute to do so</b>                                                                                                                                                                                                                                                         |               |                                                                              | 1 point is awarded for each 3 cities (8 points for 24 or more cities)                                                      |
| [note enumerated cities here]                                                                                                                                                                                                                                                                                                                                                                   |               |                                                                              |                                                                                                                            |
| <b>“Please watch carefully and then try tapping the same pattern”. (Speed 2 Hz= 2 beats per second). If the pattern is reproduced correctly, 2 points are awarded. If not, the pattern is given again by the administrator (“I’ll tap the pattern again.... Please try again now”). If the pattern is now reproduced correctly, 1 point is awarded. B=both hands, L=left hand; R=right hand</b> |               |                                                                              |                                                                                                                            |
| 13. R-L-R-L-R-L-R-L                                                                                                                                                                                                                                                                                                                                                                             |               | 14. L-R-R-L-R-R-L-R-R-L-R-R<br>(R-L-L-R-L-L etc. is also considered correct) |                                                                                                                            |
| 15. B-L-B-R-B-L-B-R-B-L-B-R<br>(B-R-B-L etc. is also considered correct)                                                                                                                                                                                                                                                                                                                        |               | 16. B-L-R-B-R-L-B-L-R-B-R-L<br>(B-R-L-B-L-R etc. is also considered correct) |                                                                                                                            |

|                     |  |
|---------------------|--|
| name:               |  |
| date of birth:      |  |
| date of testing:    |  |
| years of education: |  |

| cognitive domains                                                                                                | score (max) | z-score |
|------------------------------------------------------------------------------------------------------------------|-------------|---------|
| total (questions 1 to 16)                                                                                        | (50)        |         |
| semantic memory (questions 1 to 5)                                                                               | (10)        |         |
| verbal memory (question 6)                                                                                       | (8)         |         |
| visual construction (questions 7 to 10)                                                                          | (8)         |         |
| verbal fluency (question 11)<br><b>Caution: The absolute number of cities named is decisive for the z-value!</b> | (8)         |         |
| visual memory (question 12)                                                                                      | (8)         |         |
| cognitive flexibility (questions 13 to 16)                                                                       | (8)         |         |

## Hints regarding administration and scoring:

### Questions 1 to 4:

Award 2 points each, if first question (e.g.: “*What is the name of the animal with the long trunk?*”) was answered correctly. Otherwise, give the additional hint, (e.g.: “*It's a very big animal that can 'trumpet' using its trunk*”). If the answer is now correct, award 1 point. In any case, name the animal you are looking for again: “*(Right.) The elephant was asked for*”.

### Question 5:

Award 1 point for each correct answer.

### Question 6:

For each animal that was remembered correctly (elephant, giraffe, zebra, polar bear), 2 points are given. For each animal that could NOT be remembered, give the three options. If the correct animal is selected, 1 point is awarded.

### Questions 7 to 10:

If the shape is drawn correctly by the participant (shape can be clearly recognized, regardless if a mirror image is drawn or not) 2 points are awarded. If not, repeat the shape. If the shape is now drawn correctly, award 1 point.

### Question 11:

Larger cities ( $\geq 50\,000$  inhabitants) are counted. If the client chooses cities from only your county, point out that cities abroad are also counted. 1 point is awarded for each 3 cities (8 points for 24 or more cities). (Example: 7 cities  $\rightarrow$  2 points, 14 cities  $\rightarrow$  4 points etc.)

### Question 12:

See question 6 above: For each shape that was remembered correctly without any hint, 2 points are awarded. Give hints for the remaining shapes that could not be remembered, (e.g.: “*one shape looked like a letter*”). If the correct shape then is drawn, one point is awarded.

### Questions 13 through 16:

If a tapping pattern was given 0 points, do not administer the following tapping patterns. (Example: Client has been awarded 2 points for the first, 1 point for the second and no points for the third tapping pattern. The fourth tapping pattern will not be administered then).

### Interpretation of the total score:

- $< 38$ : Possible dementia syndrome
- $< 41$ : Possible mild cognitive impairment (MCI). In this case, however, the „MCI-score“ (sum of the scores for "visual-spatial memory" and "cognitive flexibility") is more sensitive. Suspected MCI for MCI-scores  $< 11$ .

Normative sample (n=136 participants without cognitive impairment) from Trapp et al. 2020, submitted)

|           | Task                  | women                     | men          |
|-----------|-----------------------|---------------------------|--------------|
|           |                       | mean (standard deviation) |              |
| age < 75  | semantic memory       | 9.78 (0.51)               |              |
|           | verbal memory         | 7.12 (0.77)               |              |
|           | visual construction   | 7.72 (0.64)               |              |
|           | verbal fluency        | 19.06 (6.55)              |              |
|           | visual memory         | 7.18 (1.21)               |              |
|           | cognitive flexibility | 5.74 (1.66)               |              |
| age >= 75 | semantic memory       | 9.75 (0.68)               |              |
|           | verbal memory         | 7.00 (0.90)               |              |
|           | visual construction   | 7.65 (0.57)               |              |
|           | verbal fluency        | 17.62 (5.05)              | 20.32 (6.10) |
|           | visual memory         | 6.87 (1.13)               |              |
|           | cognitive flexibility | 5.23 (1.47)               |              |

“Years of education” (<=12 j vs. > 12 j) is without influence on the test results.  
 Gender differences were found for the verbal fluency task only (men >= 75j score higher than women >= 75j,  $t_{(84)}=2.21$ ,  $p=.030$ ).
