# Supplementary material for: Sensitivity and specificity of the Bamberg Dementia Screening Test’s (BDST) full and short versions: brief screening instruments for geriatric patients that are suitable for infectious environments
Source: BMC Med. 2021 Mar 5;19:65. doi: 10.1186/s12916-021-01927-4 (PMC7934397; doi:10.1186/s12916-021-01927-4)
Supplement: Supplementary file 2 — Additional file 2. BDST test form in German. [file 12916_2021_1927_MOESM2_ESM.pdf]

# BDST

| Zunächst stelle ich Ihnen einige Rätselfragen zu Tieren                                                                                                                                                                                                                                                  | Punkte |                                                                                                                      | 6. Nach welchen Tieren wurde gerade eben gefragt? (nur die ersten 6 Antworten werten) |
|----------------------------------------------------------------------------------------------------------------------------------------------------------------------------------------------------------------------------------------------------------------------------------------------------------|--------|----------------------------------------------------------------------------------------------------------------------|---------------------------------------------------------------------------------------|
|                                                                                                                                                                                                                                                                                                          | Pr.    | Abr.                                                                                                                 |                                                                                       |
| 1. Wie heißt das Tier mit dem langen Rüssel?                                                                                                                                                                                                                                                             |        |                                                                                                                      | War Nilpferd, Elefant oder Nashorn dabei?                                             |
| Es handelt sich um ein sehr großes Tier, das mit seinem Rüssel „trompeten“ kann                                                                                                                                                                                                                          |        |                                                                                                                      |                                                                                       |
| 2. Wie heißt das Tier mit dem sehr langen Hals?                                                                                                                                                                                                                                                          |        |                                                                                                                      | War Leopard, Giraffe oder Papagei dabei?                                              |
| Das Tier lebt in Afrika und ist gelb-braun gemustert                                                                                                                                                                                                                                                     |        |                                                                                                                      |                                                                                       |
| 3. Wie heißt das Tier, nach dem ein schwarz-weiß gestreifter Fußgänger-Überweg benannt ist?                                                                                                                                                                                                              |        |                                                                                                                      | War Zebra, Tiger oder Affe dabei?                                                     |
| Es handelt sich um ein Tier, das aussieht wie ein gestreiftes Pferd                                                                                                                                                                                                                                      |        |                                                                                                                      |                                                                                       |
| 4. Wie heißt der Bär, der in sehr kalten Regionen lebt, in denen es Eis gibt?                                                                                                                                                                                                                            |        |                                                                                                                      | War Pinguin, Robbe oder Eisbär dabei?                                                 |
| Setzen sie einfach die Worte „Bär“ und „Eis“ in der richtigen Reihenfolge zusammen                                                                                                                                                                                                                       |        |                                                                                                                      |                                                                                       |
| 5. Vor welchem Tier haben die Menschen mehr Angst: Löwe oder Kaninchen?                                                                                                                                                                                                                                  |        |                                                                                                                      |                                                                                       |
| Warum? (gefährlich, Fleischfresser etc.)                                                                                                                                                                                                                                                                 |        |                                                                                                                      |                                                                                       |
| Bitte versuchen Sie, die folgenden Figuren in der Luft nachzuzeichnen (2 Punkte falls erster, 1 Punkt, falls 2. Versuch richtig)                                                                                                                                                                         |        | 12. Bitte versuchen Sie jetzt noch einmal, alle Figuren von gerade eben aus dem Gedächtnis „in die Luft“ zu zeichnen |                                                                                       |
| 7.<br>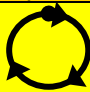                                                                                                                                                                                                                |        |                                                                                                                      | Eine Figur war rund                                                                   |
| 8.<br>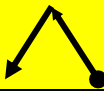                                                                                                                                                                                                                |        |                                                                                                                      | Eine Figur sah aus wie eine Spitze                                                    |
| 9.<br>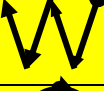                                                                                                                                                                                                                |        |                                                                                                                      | Eine Figur sah aus wie ein Buchstabe                                                  |
| 10.<br>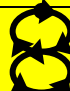                                                                                                                                                                                                               |        |                                                                                                                      | Eine Figur sah aus wie eine Zahl                                                      |
| 11. Bitte zählen Sie mir jetzt so viele größere Städte in Deutschland oder in der Welt auf, wie Ihnen einfallen, Sie haben dafür 1 Minute Zeit                                                                                                                                                           |        | Punkte (ganzzahlig, Vorkommastelle zählt) = Anzahl genannter Städte / 3, max 8                                       |                                                                                       |
|                                                                                                                                                                                                                                                                                                          |        |                                                                                                                      |                                                                                       |
| Bitte versuchen Sie jetzt, genauso zu klopfen wie ich. (Geschwindigkeit 2 Hz= 2 Schläge pro Sekunde. Falls nicht richtig wiederholt, noch einmal demonstrieren). 2 Punkte, falls richtig im ersten, 1 Punkt falls richtig im zweiten Versuch, 0 Punkte sonst. B=beide Hände, L=linke Hand; R=rechte Hand |        |                                                                                                                      |                                                                                       |
| 13. L-R-L-R-L-R                                                                                                                                                                                                                                                                                          |        | 14. L-R-R-L-R-R-L-R-L-R-R<br>(R-L-L-R-L-L etc. gilt auch)                                                            |                                                                                       |
| 15. B-L-B-R-B-L-B-R-B-L-B-R<br>(B-R-B-L etc. gilt auch)                                                                                                                                                                                                                                                  |        | 16. B-L-R-B-R-L-B-L-R-B-R-L<br>(B-R-L-B-L-R etc. gilt auch)                                                          |                                                                                       |

|                   |  |
|-------------------|--|
| Name:             |  |
| Geburtsdatum:     |  |
| Testdatum:        |  |
| Ausbildungsjahre: |  |

| Scores                                                                                                                | Punktwert<br>(Max) | z-Wert |
|-----------------------------------------------------------------------------------------------------------------------|--------------------|--------|
| Gesamt (Fragen 1-16)                                                                                                  | (50)               |        |
| Semantik (Fragen 1-5)                                                                                                 | (10)               |        |
| verbales Gedächtnis (Frage 6)                                                                                         | (8)                |        |
| Konstruktive Praxis (Fragen 7-10)                                                                                     | (8)                |        |
| Verbale Flüssigkeit (Frage 11)<br><b>Achtung: Für den z-Wert ist die absolute Anzahl genannter Städte maßgeblich!</b> | (8)                |        |
| Visuell-räumliches Gedächtnis (Frage 12)                                                                              | (8)                |        |
| Kognitive Flexibilität (Fragen 13-16)                                                                                 | (8)                |        |

## **Bewertungs- und Vorgabehinweise:**

### **Fragen 1 bis 4:**

Jeweils 2 Punkte, falls erste Frage (z.B.: *Wie heißt das Tier mit dem langen Rüssel?*) richtig beantwortet wurde. Wurde die erste Frage nicht richtig beantwortet, „Hilfsfrage“ (z.B.: *Es handelt sich um ein sehr großes Tier, das mit seinem Rüssel „trompeten“ kann*) stellen. Falls das gesuchte Tier dann benannt wird, 1 Punkt vergeben. Das gesuchte Tier in jedem Fall noch einmal benennen: „(Richtig.) Der Elefant war gesucht“.

### **Frage 5:**

1 Punkt für jede richtige Antwort.

### **Frage 6:**

2 Punkte für jedes im freien Abruf richtig genannte Tier (Elefant, Giraffe, Zebra, Eisbär). Bei nicht genannten Tieren die Alternativen vorgeben. Falls das richtige Tier dann erkannt wird, 1 Punkt vergeben.

### **Fragen 7 bis 10:**

Jeweils 2 Punkte, wenn die Figur im ersten Versuch richtig reproduziert wurde. Falls dies nicht gelingt, die Figur noch einmal „vorzeichnen“. Jeweils 1 Punkt, wenn die Figur im zweiten Versuch richtig reproduziert wurde.

### **Frage 11:**

Es werden größere Städte (ab einer Einwohnerzahl von ca. 50 000) gewertet. Falls die Testperson ausschließlich Städte in Deutschland nennt, darauf hinweisen, dass auch Städte im Ausland gewertet werden. 1 Punkt pro drei genannter Städte, maximal 8 Punkte (für 24 oder mehr Städte) vergeben. (Bsp.: 7 genannte Städte → 2 Punkte, 14 genannte Städte → 4 Punkte etc.)

### **Frage 12:**

Bewertung wie Frage 6: 2 Punkte für jede frei reproduzierte Figur. Für jede Figur, die nicht bzw. nicht richtig erinnert wurde, die jeweilige Hilfestellung (z.B.: *Eine Figur sah aus wie ein Buchstabe*) geben. Falls die Figur dann richtig wiedergegeben wird, 1 Punkt vergeben.

### **Fragen 13 bis 16:**

Falls eine Aufgabe mit 0 Punkten bewertet wurde, die folgenden Aufgaben nicht mehr vorgeben. (Bsp.: Pat. hat auf das erste Klopfmuster 2 Punkte, auf das zweite 1 Punkt und auf das dritte Klopfmuster 0 Punkte erhalten. Das vierte Klopfmuster wird deshalb nicht mehr vorgegeben).

## **Interpretation des Gesamtscores:**

- < 38: Verdacht auf dementielles Syndrom
- < 41: Verdacht auf leichte kognitive Störung (MCI), hier ist allerdings der „MCI-Score“ (Summe der Scores für „visuell-räumliches Gedächtnis“ und „kognitive Flexibilität“) trennschärfer. Verdacht auf MCI bei MCI-Score < 11.

**Normwerte (n=136 Kontrollen aus Trapp et al. 2020, submitted)**

|                       | Subtest                              | Frauen       | Männer       |
|-----------------------|--------------------------------------|--------------|--------------|
|                       |                                      | M (STD)      | M (STD)      |
| <b>Alter &lt; 75</b>  | <b>Semantisches Gedächtnis</b>       | 9.78 (0.51)  |              |
|                       | <b>Verbales Gedächtnis</b>           | 7.12 (0.77)  |              |
|                       | <b>Konstruktive Praxis</b>           | 7.72 (0.64)  |              |
|                       | <b>Verbale Flüssigkeit</b>           | 19.06 (6.55) |              |
|                       | <b>Visuell-räumliches Gedächtnis</b> | 7.18 (1.21)  |              |
|                       | <b>Kognitive Flexibilität</b>        | 5.74 (1.66)  |              |
| <b>Alter &gt;= 75</b> | <b>Semantisches Gedächtnis</b>       | 9.75 (0.68)  |              |
|                       | <b>Verbales Gedächtnis</b>           | 7.00 (0.90)  |              |
|                       | <b>Konstruktive Praxis</b>           | 7.65 (0.57)  |              |
|                       | <b>Verbale Flüssigkeit</b>           | 17.62 (5.05) | 20.32 (6.10) |
|                       | <b>Visuell-räumliches Gedächtnis</b> | 6.87 (1.13)  |              |
|                       | <b>Kognitive Flexibilität</b>        | 5.23 (1.47)  |              |

Ausbildungsdauer (<=12 j vs. > 12 j) hat keinen Einfluss auf die Testwerte.

Geschlechtsunterschiede ergeben sich nur für die verbale Flüssigkeitsaufgabe (Männer >= 75j sind besser als Frauen >= 75j,  $t_{(84)}=2.21$ ,  $p=.030$ )
